# Supplementary material for: Chitosan-4-mercaptobenzoic acid: synthesis and characterization of a novel thiolated chitosan
Source: Royal Society of Chemistry journal article supplement (doi:10.1039/b916528b), 2010-01-01
Supplement: b916528b.pdf [file b916528b.pdf]

Supporting information: FT-IR analysis

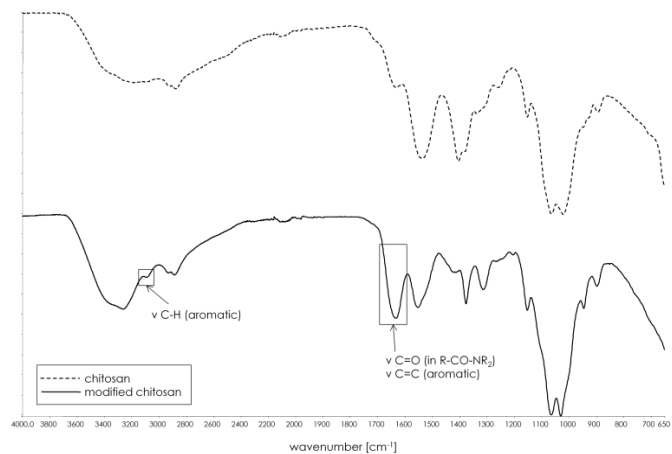

Fig.S1. FT-IR spectrum of chitosan and unmodified chitosan
